# Supplementary material
Source: MDPI journal article supplement (https://www.mdpi.com/2073-4441/16/9/1220)
Supplement: s1 [file s1]

Archive with 2 entries (2 files):
- PRISMA-ScR_Checklist.pdf
- PRISMA_2020_flow_diagram.pdf
