# Supplementary material
Source: MDPI journal article supplement (https://www.mdpi.com/2073-4441/16/9/1220)

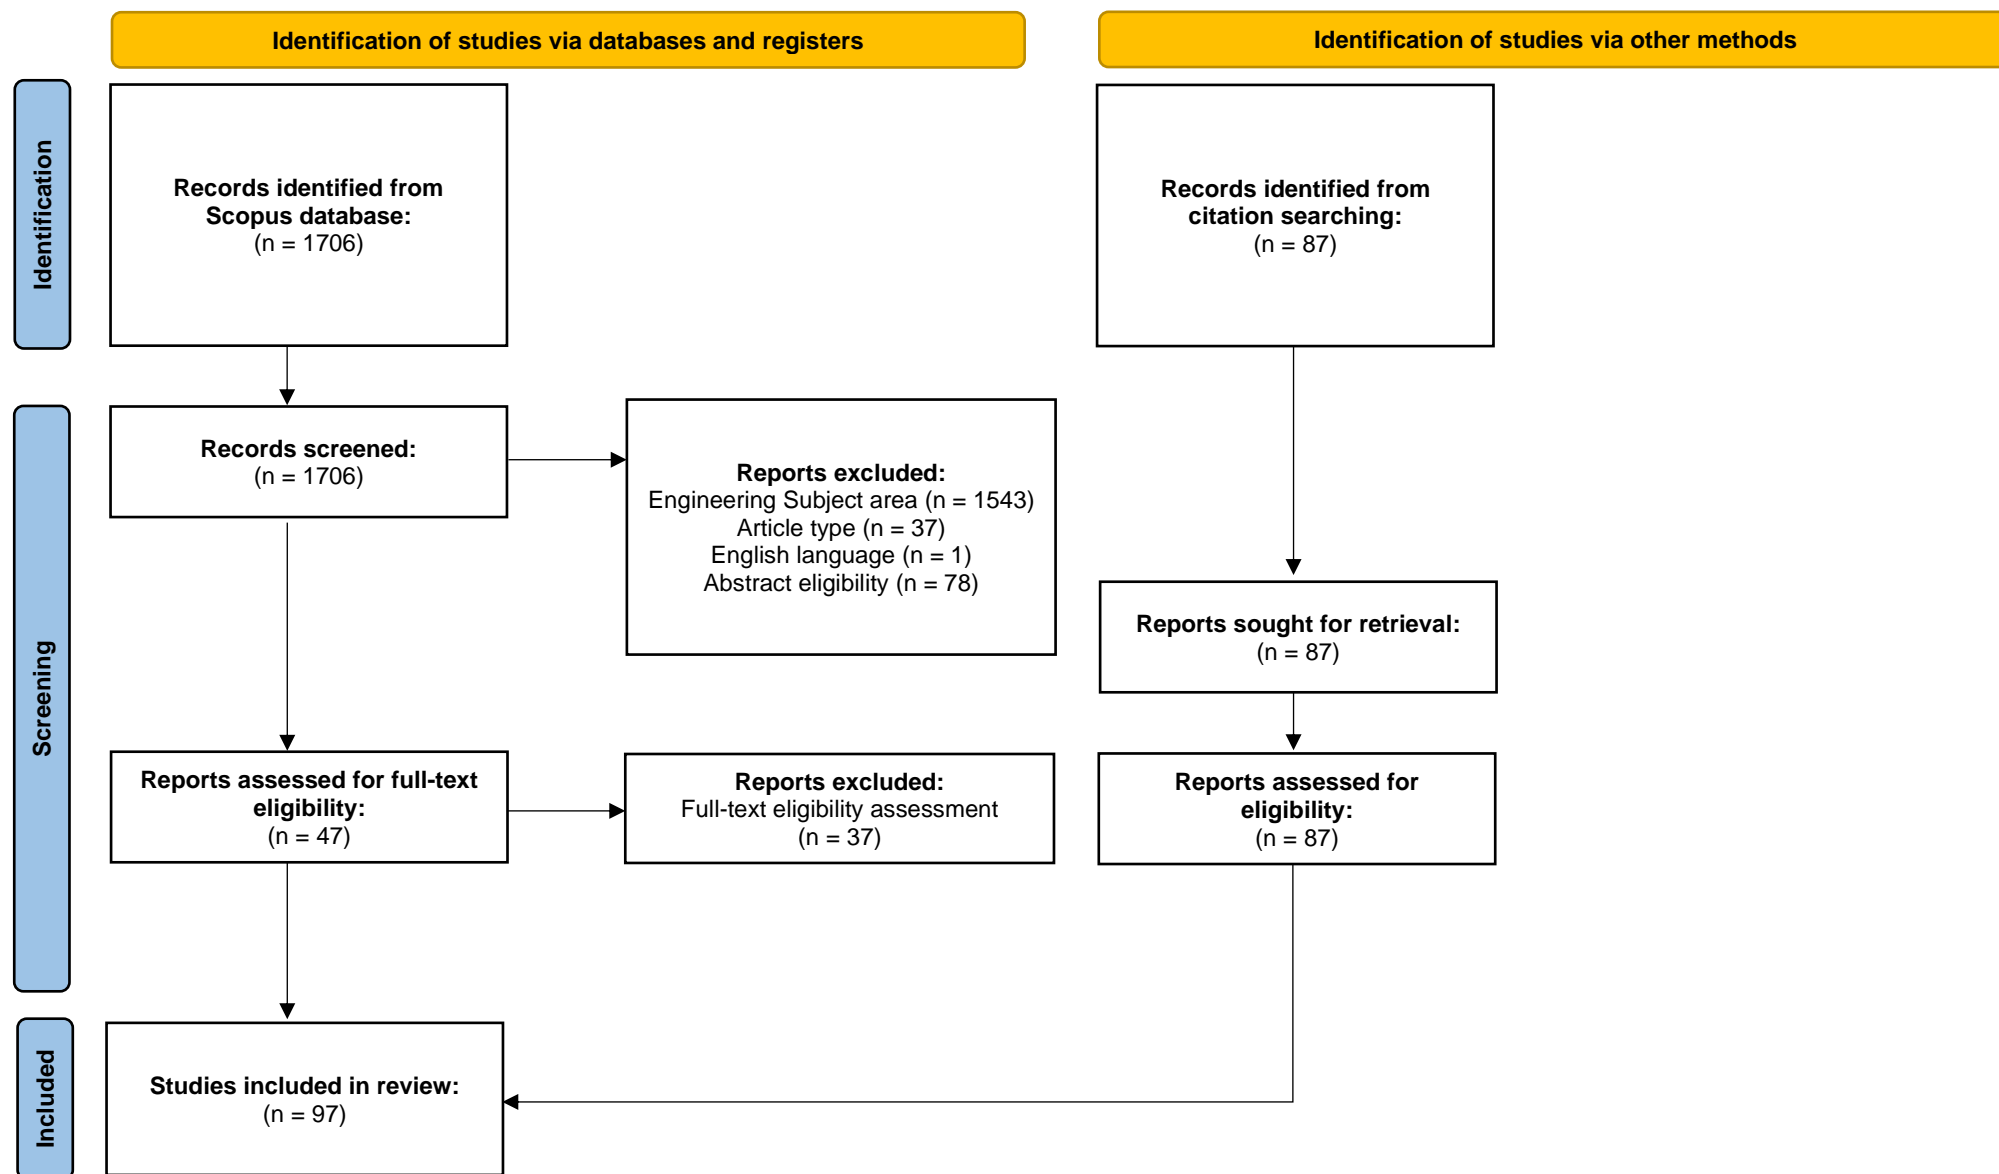

Supplement: s1 [file s1 › PRISMA_2020_flow_diagram.pdf]
